# Supplementary material for: Phase transition dynamics of single optically trapped aqueous potassium carbonate particles
Source: Royal Society of Chemistry journal article supplement (doi:10.1039/c8cp00599k), 2018-01-01
Supplement: c8cp00599k1.pdf [file c8cp00599k1.pdf]

## PCCP- Electronic Supplementary Information

# Phase transition dynamics of single optically trapped aqueous potassium carbonate particles<sup>†</sup>

Kıvanç Esat, Grégory David, Theodoros Poulkas, Mikhail Shein, Ruth Signorell\*

### 1 Bulk sample Raman scattering measurements

Single aqueous  $\text{K}_2\text{CO}_3$  particles are trapped with a counter propagating tweezer and dried while being interrogated with time resolved broad band light scattering (BLS) and Raman scattering measurements. Particle size and refractive index (Cauchy parameters,  $m_0(\lambda)$ ,  $m_1$ ) are determined with BLS measurements. The Raman shift is used to monitor the  $\text{CO}_3^{2-}$  symmetric stretching peak position,  $\nu_1(\text{CO}_3^{2-})$ . See the main text for the experimental details.<sup>†</sup> Measured values of  $\nu_1(\text{CO}_3^{2-})$  are compared with bulk solution measurements in order to determine the particle concentration prior to supersaturation. The bulk aqueous  $\text{K}_2\text{CO}_3$  solution saturation point is  $8.1 \pm 0.7 \text{ mol kg}^{-1}$  corresponding to 43% relative humidity (RH) in equilibrium.

**Table 1** Bulk solution measurements.

| Molality/ $\text{mol kg}^{-1}$ | $\nu_1(\text{CO}_3^{2-}) / \text{cm}^{-1}$ |
|--------------------------------|--------------------------------------------|
| 3                              | 1062.4                                     |
| 4                              | 1062.2                                     |
| 6                              | 1061.4                                     |
| 7                              | 1061.0                                     |
| 8                              | 1060.2                                     |
| Crystalline powders            | 1060.5                                     |

**Table 2** Single particle measurement during a drying experiment. The numbers in the square brackets indicate the 95 % credible interval.

| RH/% | $m_0(400\text{nm})$  | $m_1$                   | $\nu_1(\text{CO}_3^{2-}) / \text{cm}^{-1}$ |
|------|----------------------|-------------------------|--------------------------------------------|
| 67.6 | 1.425 [1.417, 1.437] | 0.0236 [0.0196, 0.0276] | 1061.31                                    |
| 62.8 | 1.430 [1.422, 1.438] | 0.0228 [0.0196, 0.0260] | 1061.20                                    |
| 56.6 | 1.438 [1.421, 1.446] | 0.0248 [0.0208, 0.0296] | 1060.84                                    |
| 49.2 | 1.441 [1.428, 1.454] | 0.0252 [0.0208, 0.0288] | 1060.51                                    |
| 43.3 | 1.440 [1.431, 1.454] | 0.0260 [0.0220, 0.0292] | 1059.99                                    |
| 38.2 | 1.442 [1.433, 1.451] | 0.0272 [0.0240, 0.0308] | 1059.59                                    |
| 33.1 | 1.446 [1.437, 1.460] | 0.0268 [0.0228, 0.0308] | 1059.11                                    |
| 29.6 | 1.451 [1.432, 1.461] | 0.0260 [0.0212, 0.0312] | 1058.55                                    |
| 27.6 | 1.446 [1.432, 1.460] | 0.0268 [0.0220, 0.0312] | 1058.26                                    |
| 25.4 | 1.453 [1.439, 1.468] | 0.0272 [0.0216, 0.0328] | 1057.68                                    |
| 23.2 | 1.457 [1.442, 1.472] | 0.0284 [0.0232, 0.0340] | 1057.39                                    |
| 20.8 | 1.462 [1.447, 1.477] | 0.0264 [0.0208, 0.0324] | 1056.93                                    |
| 19.1 | 1.456 [1.441, 1.472] | 0.0288 [0.0232, 0.0336] | 1056.37                                    |
| 17.5 | 1.461 [1.445, 1.476] | 0.0276 [0.0220, 0.0344] | 1056.00                                    |
| 16.1 | 1.461 [1.445, 1.477] | 0.0272 [0.0216, 0.0324] | 1055.88                                    |
| 15.1 | 1.466 [1.445, 1.476] | 0.0280 [0.0228, 0.0340] | 1055.94                                    |
| 14.1 | 1.470 [1.454, 1.480] | 0.0280 [0.0228, 0.0340] | 1055.64                                    |
| 13.3 | 1.470 [1.459, 1.486] | 0.0280 [0.0228, 0.0332] | 1055.23                                    |
| 12.6 | 1.473 [1.462, 1.484] | 0.0272 [0.0228, 0.0328] | 1055.18                                    |

Laboratory of Physical Chemistry, ETH Zürich, Vladimir-Prelog-Weg 2, CH-8093, Zürich, Switzerland. E-mail: rsignorell@ethz.ch

<sup>†</sup> See DOI: 10.1039/b000000x/

## 2 Initial water uptake during deliquescence

Broad band light scattering (BLS) experiments measure the intensity of light scattered by a single particle as a function of wavelength,  $\lambda$ . Resonances give rise to a ripple structure in the BLS spectrum (see Fig.1 in the main text). The position and the intensity profile of a specific resonance mode depend on the particle shape, the particle radius  $R$  (volume equivalent diameter for non-spherical particles), the wavelength of the light  $\lambda$ , and the refractive index  $m(\lambda)$ . Since the ratio of  $R$  and  $\lambda$  determines the resonance behaviour of the light within the particle it is convenient to define the size parameter  $x = 2\pi N\lambda/R$  where  $N$  is the refractive index of the surrounding medium (here  $N=1$ ).<sup>1</sup> The shift of the resonance position  $\Delta\lambda$  indicates a change of  $R$  because the value of  $x$  at resonance remains constant. The change in  $R$  can then be calculated using Equation (1) under the assumption that the particle's shape and  $m(\lambda)$  do not change appreciably. In the equation  $\lambda_R$  is the resonance position before the deliquescence starts.

$$\Delta R \sim \frac{R\Delta\lambda}{\lambda_R} \quad (1)$$

During the deliquescence experiment shown in Fig.8 in the main text ( $9.5\% \leq \text{RH} \leq 30\%$ ) the peak positions in the BLS spectra drifts by  $\Delta\lambda/\lambda_R = 0.5\%$ . The particle size prior the efflorescence (at  $t_E - 10$  ms) is  $R = 2070.5$  [2052 2086] nm. Hence  $\Delta R$  is  $\sim 10$ nm.

### References

- 1 C. F. Bohren and D. R. Huffman, *Absorption and scattering of light by small particles*, Wiley, Weinheim, Germany, Wiley Professional Paperback edn., 1983.
